# Supplementary material
Source: PubMed Central journal article supplement (PMC4188146)
Supplement: chest_146_4_899_ds01.pdf [file chest_146_4_899_ds01.pdf]

# Characteristics and Outcomes of Patients Hospitalized Following Pulmonary Aspiration

*Augustine Lee, MD, FCCP; Emir Festic, MD; Pauline K. Park, MD; Krishnan Raghavendran, MD; Ousama Dabbagh, MD, FCCP; Adebola Adesanya, MD, FCCP; Ognjen Gajic, MD, FCCP; Raquel R. Bartz, MD, FCCP; and the United States Critical Illness and Injury Trials Group*

CHEST 2014;146(4):899-907

## **e-Appendix 1.**

### **Methods, supplement:**

Covariates used in the multiple logistic regression models to predict the outcomes of death, acute respiratory distress syndrome, or the need for invasive ventilation:

- Age
- Gender
- Acute Physiology and Chronic Health Evaluation II
- Lung Injury Prediction Score (When aspiration was being tested as a separate dependent variable, a modified score deducting the numerical contribution of aspiration to the Lung Injury Prediction Score was used)

Covariates used in the final multiple logistic regression model used to predict aspiration:

- Demographics and anthropomorphic variables
  - Age
  - Gender
  - Race: Caucasian
  - Obesity (BMI $\geq$ 30)
  - Malnourished (BMI $<$ 18.5)
  - Admission from a nursing home
- Other ARDS predisposing risk factors
  - Pneumonia (without aspiration)
  - Sepsis
  - Shock
  - Brain injury
  - Acute abdomen
  - High-risk trauma
  - Emergency surgery
- Other risk-modifiers and comorbidities
  - Gastroesophageal reflux disease
  - Diabetes mellitus
  - Cirrhosis

*Online supplements are not copyedited prior to posting.*

# CHEST™ Online Supplement

- Chronic hemodialysis
- New York Heart Association class IV congestive heart failure
- Chronic lung disease: chronic obstructive pulmonary disease, asthma, interstitial lung disease
- Prior chest radiation
- Obstructive sleep apnea
- Malignancy: lymphoma, leukemia, metastatic solid cancers
- Medications: proton pump inhibitor, H2 antagonists, benzodiazepines, opiates, anti-psychotics, neurotropic medications, oral hypoglycemics, insulin
- Excessive alcohol use: >14 alcoholic beverages/week or known alcohol related illness
- Smoking status
- Glasgow Coma Scale

Interactions tested for, but were not significant, included: Proton pump inhibitors with gastroesophageal reflux disease, Glasgow Coma Scale with brain injury, nursing home with age.

*Online supplements are not copyedited prior to posting.*
